# Supplementary material for: Large Chromosomal Rearrangements during a Long-Term Evolution Experiment with Escherichia coli
Source: PubMed Central journal article supplement — mBio. 2014 Sep 9;5(5):e01377-14. doi: 10.1128/mBio.01377-14 (PMC4173774; doi:10.1128/mbio.01377-14), 2014-09-09
Supplement: mbo005141985sf1.pdf [file mbo005141985sf1.pdf]

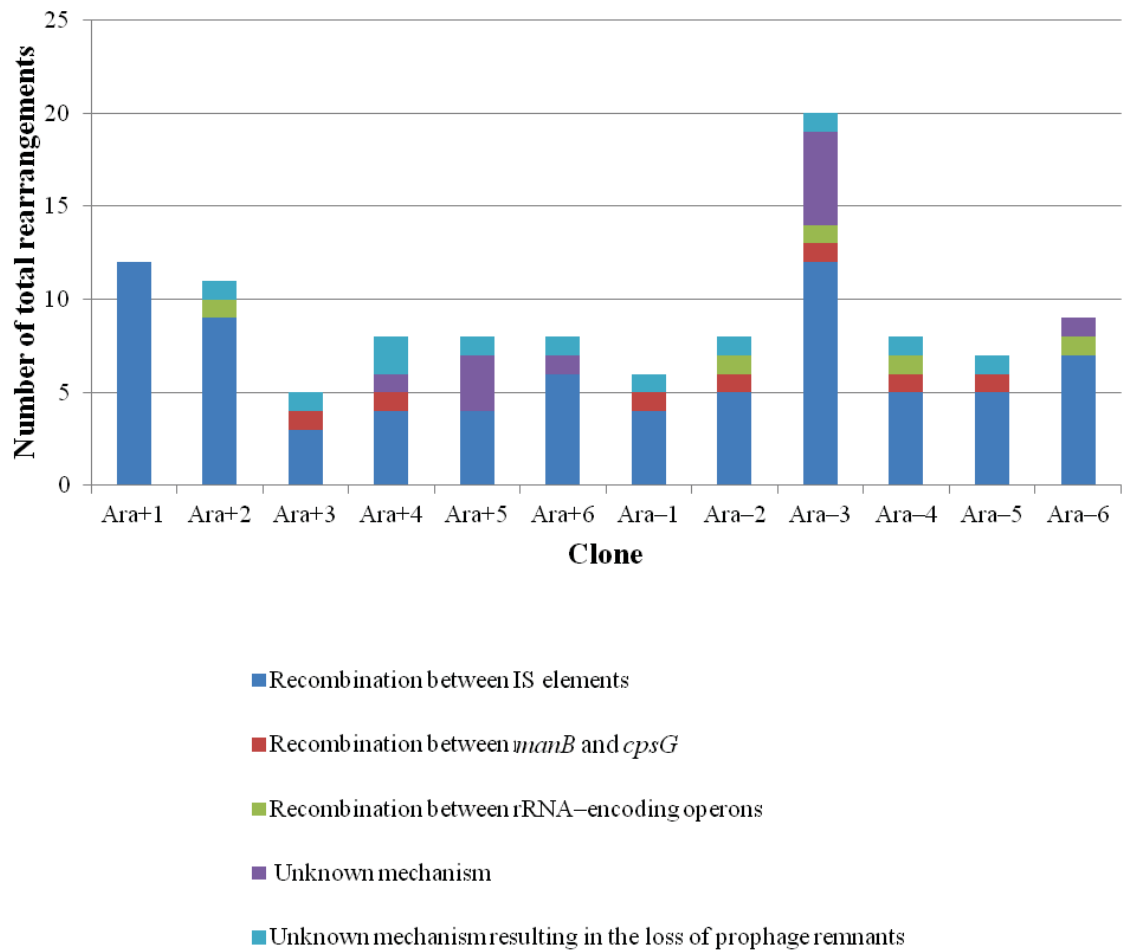

**FIG S1** Number of rearrangements in clones sampled from each of the 12 populations at 40,000 generations. Colors indicate the different types of rearrangements according to the genetic mechanism of production (see text).
